# Supplementary material for: Hsp70 targets Hsp100 chaperones to substrates for protein disaggregation and prion fragmentation
Source: PubMed Central journal article supplement — J Cell Biol. 2012 Aug 6;198(3):387–404. doi: 10.1083/jcb.201201074 (PMC3413357; doi:10.1083/jcb.201201074), 2012-08-06
Supplement: supp_jcb.201201074_JCB_201201074_sm.pdf [file supp_jcb.201201074_JCB_201201074_sm.pdf]

Winkler et al., <http://www.jcb.org/cgi/content/full/jcb.201201074/DC1>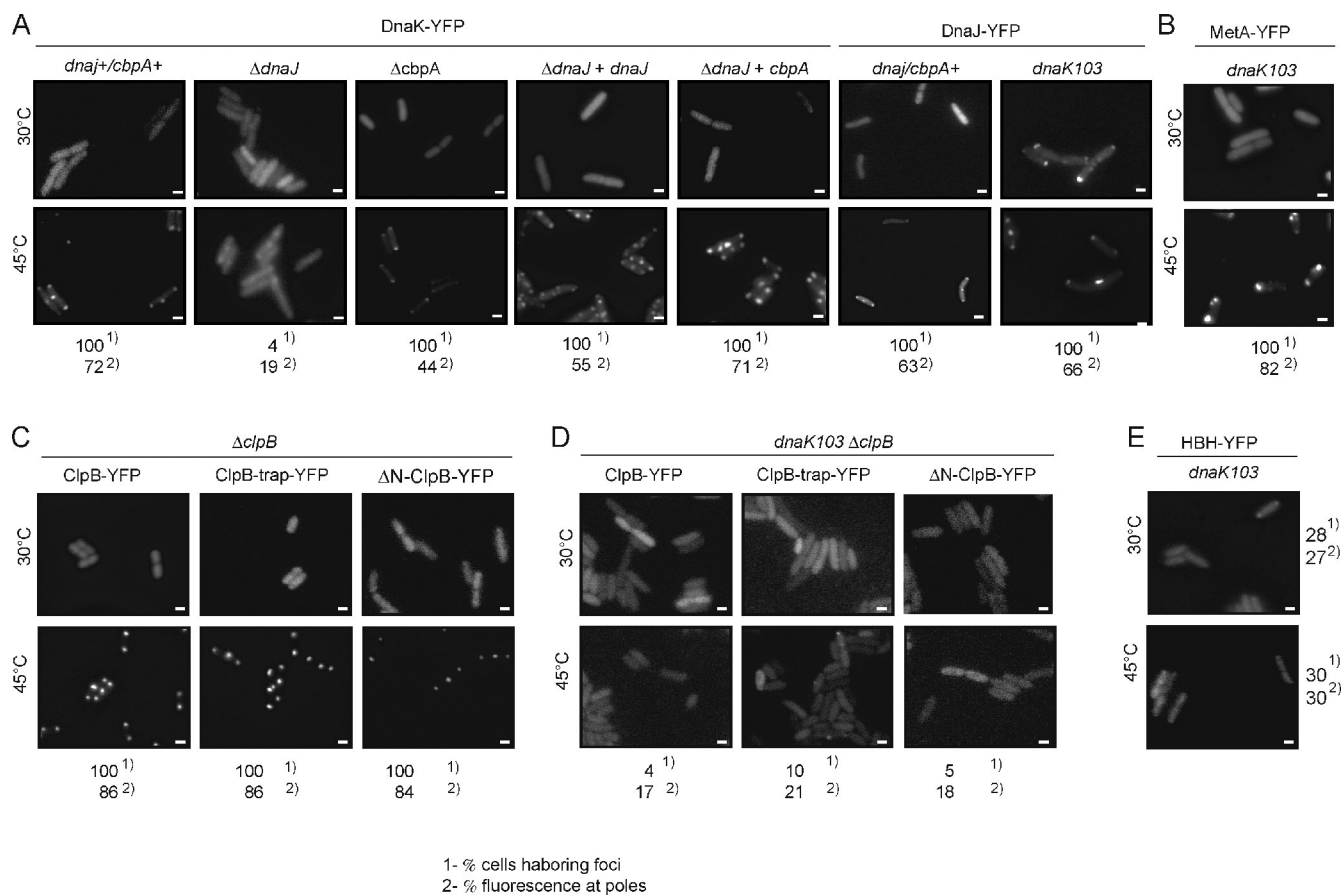

Figure S1. **Hierarchical association of disaggregating chaperones with protein aggregates in *E. coli* cells.** (A) J proteins target DnaK to protein aggregates. *E. coli* wild type (*dnaj+/cbpA+*), *dnajK103*,  $\Delta$ *dnaj*, and  $\Delta$ *cbpA* mutant cells expressing DnaK-YFP or DnaJ-YFP fusions were grown at 30°C to mid-log phase and shifted to 45°C for 20 min. The occurrence of stress-induced polar foci indicated binding to protein aggregates. Polar localization of DnaK-YFP in  $\Delta$ *dnaj* cells was restored by in trans expression of either *dnaj* or *cbpA*. (B) Thermolabile proteins aggregated in *E. coli* *dnajK103* cells. Formation of stress-induced protein aggregates in *E. coli* *dnajK103* cells. *E. coli* *dnajK103* cells expressing the thermolabile model protein MetA-YFP were grown to mid-exponential log phase at 30°C and shifted to 45°C for 20 min. (C) ClpB-trap and  $\Delta$ N-ClpB bind to stress-induced protein aggregates in a DnaK-dependent manner. *E. coli* MC4100  $\Delta$ *clpB* cells expressing ClpB-YFP, ClpB-trap-YFP, or  $\Delta$ N-ClpB-YFP were grown to mid-exponential log phase at 30°C and shifted to 45°C for 20 min. The occurrence of heat-induced foci indicates binding to protein aggregates. The fraction of cells harboring ClpB-YFP foci was determined ( $n = 200$ ). The degree of aggregate binding was calculated by determining the fluorescence intensity of ClpB-YFP foci ( $n = 20$ ). (D) DnaK-dependent interaction of ClpB-trap-YFP and  $\Delta$ N-ClpB-YFP with protein aggregates. *E. coli* *dnajK103* cells expressing ClpB-YFP, ClpB-trap-YFP, or  $\Delta$ N-ClpB-YFP were grown to mid-exponential log phase at 30°C and shifted to 45°C for 20 min. Quantification of stress-induced ClpB-YFP foci formation was performed as described in C. (E) The hybrid protein HBH-YFP requires DnaK for efficient binding to protein aggregates in *E. coli* cells. *E. coli* *dnajK103* expressing HBH-YFP were grown to mid-exponential log phase at 30°C and shifted to 45°C for 20 min. The fraction of cells harboring HBH-YFP foci was determined ( $n = 200$ ). The degree of aggregate binding was calculated by determining the fluorescence intensity of HBH-YFP foci ( $n = 20$ ). Bars, 1  $\mu$ m.

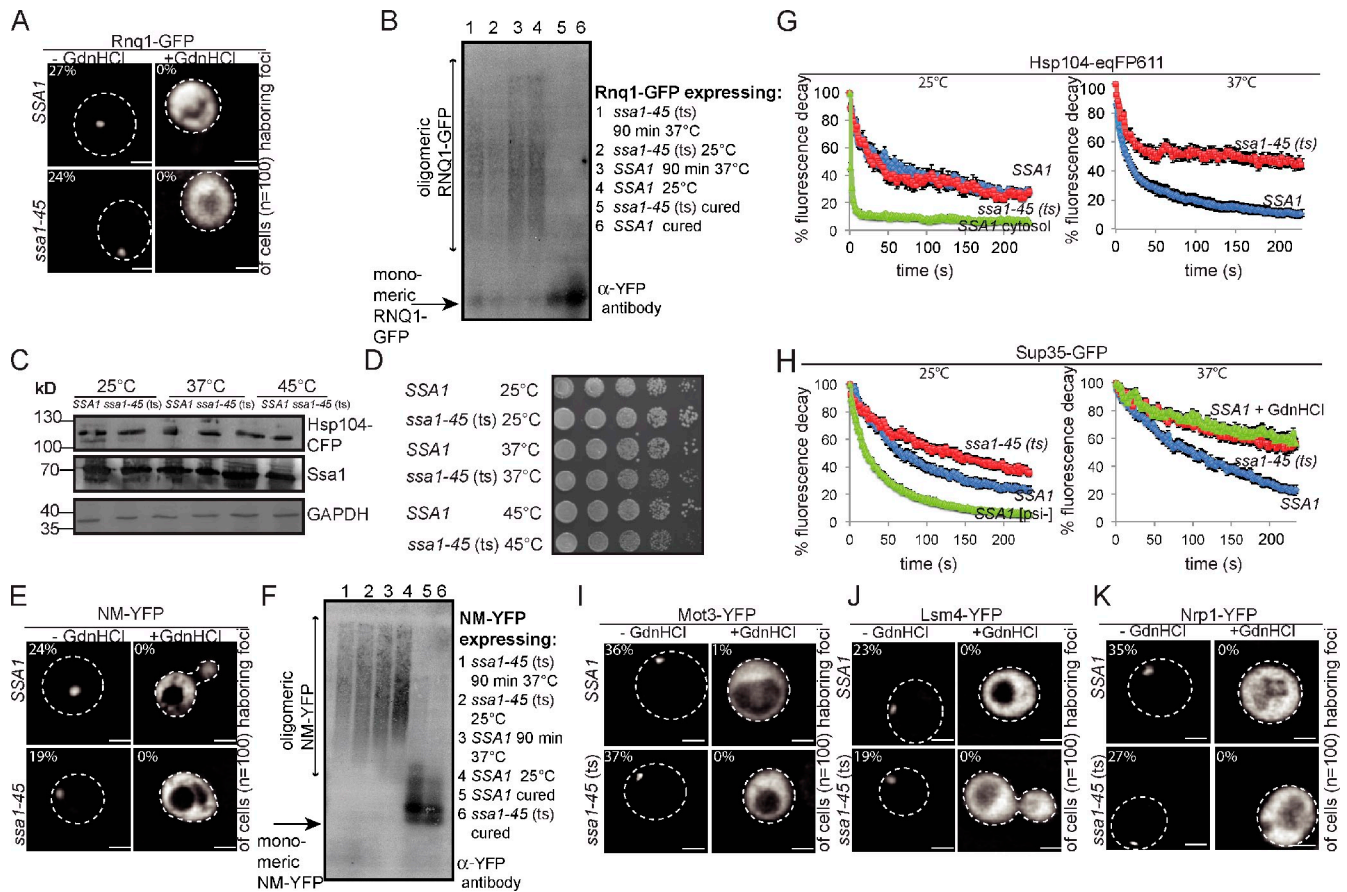

**Figure S2. Diffuse cytosolic localization of Rnq1-mcherry upon inhibition of Hsp104 by guanidinium hydrochloride (GdnHCl).** *S. cerevisiae* SSA1 or *ssa1-45*(ts) cells expressing Rnq1-mCherry were passaged three times on SD plates with or without ( $\pm$ ) 3 mM GdnHCl. Afterward, the cells were grown in SD media supplemented with 3 mM GdnHCl to mid-exponential growth phase at 25°C and were analyzed for their ability to form prion fibrils. The detection of diffuse cytosolic fluorescence indicates curing of the prion phenotype. Bars, 2  $\mu$ m. (B) Rnq1-p-GFP forms SDS-resistant aggregates in *S. cerevisiae* SSA1 and *ssa1-45*(ts) cells. *S. cerevisiae* SSA1 or *ssa1-45*(ts) cells expressing Rnq1-GFP were grown at 25°C or heat shocked to 37°C for 90 min. Total cell lysates were prepared, separated by SDD-AGE, and immunostained with YFP-specific antibodies. Furthermore, cell lysates of SSA1 or *ssa1-45*(ts) cells, which were initially treated with 3 mM GdnHCl, expressing soluble Rnq1-GFP were included in the analysis as control. The positions of soluble, monomeric protein and SDS-resistant oligomeric forms are indicated. (C) Comparable expression levels of Ssa1/Ssa1-45ts and Hsp104-CFP in SSA1 or *ssa1-45*(ts) cells. Yeast cells were grown at 25°C to mid-exponential growth phase. 12.5  $\mu$ g/ml cycloheximide was added and cells were shifted for 90 min to 37°C before being heat shocked for 20 min at 45°C. Samples were collected at 25°C, 37°C, and 45°C and subjected to Western blot analysis using Ssa1- or Hsp104-specific antibodies. Glyceraldehyde 3-phosphate dehydrogenase (GAPDH) levels were determined by specific antibodies and served as a loading control. (D) Viability of SSA1 or *ssa1-45*(ts) cells is not affected during the applied heat treatments. SSA1 or *ssa1-45*(ts) cells expressing Hsp104-CFP were grown to exponential growth phase at 25°C. Cycloheximide was added and cells were incubated at 37°C for 90 min and then heat shocked for 20 min at 45°C. At the indicated time points, cells were washed and spotted in fivefold dilutions on YPD agar plates. Plates were incubated at 25°C for 2 d. (E) Diffuse cytosolic localization of NM-YFP upon inhibition of Hsp104 by guanidinium hydrochloride (GdnHCl). *S. cerevisiae* SSA1 or *ssa1-45*(ts) cells expressing NM-YFP were passaged three times on SD plates with or without ( $\pm$ ) 3 mM GdnHCl. Afterward, the cells were grown in SD media to mid-exponential growth phase at 25°C and were analyzed for their ability to form prion fibrils. The detection of diffuse cytosolic fluorescence indicates curing of the prion phenotype. Bars, 2  $\mu$ m. (F) NM-YFP forms SDS-resistant aggregates in *S. cerevisiae* SSA1 and *ssa1-45*(ts) cells. *S. cerevisiae* SSA1 or *ssa1-45*(ts) cells expressing NM-YFP were grown at 25°C or heat shocked to 37°C for 90 min. Total cell lysates were prepared, separated by SDD-AGE, and immunostained with YFP-specific antibodies. Furthermore, cell lysates of SSA1 or *ssa1-45*(ts) cells, which were initially treated with 3 mM GdnHCl, expressing soluble NM-YFP were included in the analysis as control. The positions of soluble, monomeric protein and SDS-resistant oligomeric forms are indicated. (G and H) FLIP measurements of Hsp104-eqFP611 (G) and Sup35-GFP (H) were performed in SSA1 and *ssa1-45*(ts) cells at 25°C and 37°C. For comparison, the mobilities of diffuse Hsp104-eqFP611 located outside the foci (cytosol) or of diffuse Sup35-GFP in [*psi*<sup>-</sup>] cells were determined. The mobility of Sup35-GFP was also monitored in SSA1 cells at 37°C after the addition of GdnHCl, resulting in Hsp104 inactivation. Curves represent the mean of 15–25 cells and the corresponding standard errors. Because of the reduced photostability of eqFP611 compared with CFP, FLIP curves recorded for the different fluorophores (Fig. 4 B) cannot be directly compared (Wiedenmann et al., 2002). (I–K) Diffuse cytosolic localizations of the prion model proteins Mot3-YFP (I), Lsm4-YFP (J), and Nrp1-YFP (K) upon inhibition of Hsp104 by guanidinium hydrochloride (GdnHCl). *S. cerevisiae* SSA1 or *ssa1-45*(ts) cells expressing the indicated fluorescent prion domains were passaged three times on SD plates  $\pm$  3 mM GdnHCl. Afterward, the cells were grown in SD media to mid-exponential growth phase at 25°C and were analyzed for their ability to form prion fibrils. The detection of diffuse cytosolic fluorescence indicates curing of the prion phenotype. The broken lines indicate the borders of respective yeast cells. Bar, 2  $\mu$ m

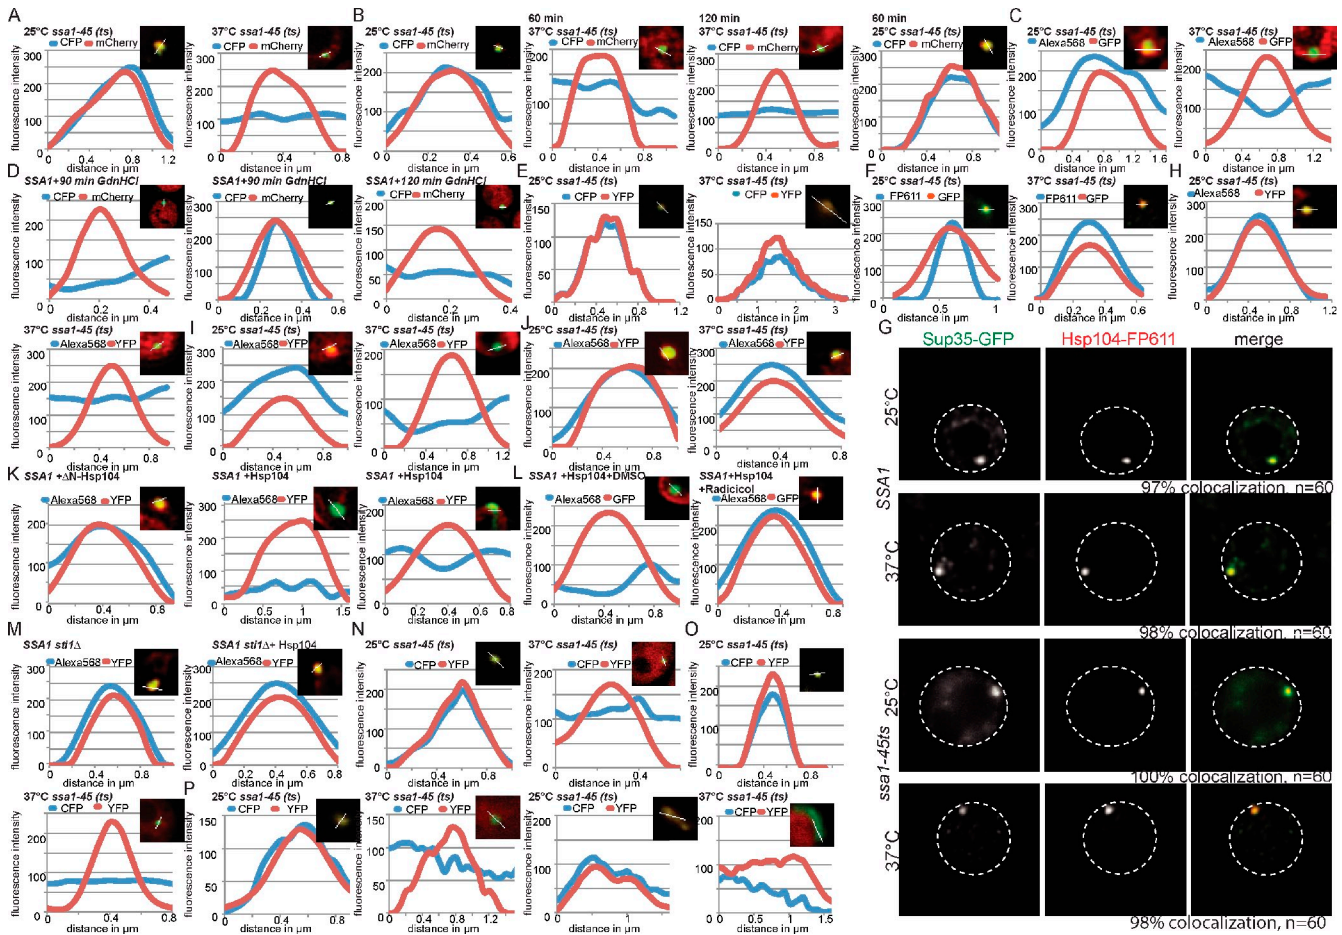

Figure S3. Colocalizations were confirmed by line intensity plots of deconvoluted wide-field images corresponding to various figures. (A–C) Fig. 3 A–C; (D) Fig. 5 A; (E) Fig. 6 A; (H) Fig. S4 A; (I) Fig. 7 A; (J) Fig. S5 A; (K) Fig. 7 B; (L–M) Fig. 8, A and B; (N–P) Fig. 9, A–C. Line intensity plots of *ssa1-45(ts)* cells are depicted (25°C and 37°C). Co-localizations observed in *SSA1* cells were also confirmed by line intensity plots but are not depicted. (F and G) Co-localization of Hsp104-eqFP611 and Sup35-GFP in *SSA1* and *ssa1-45(ts)* cells. Cells were grown at 25°C and shifted to 37°C. The frequency of Sup35-GFP and Hsp104-eqFP611 colocalization is given ( $n = 100$ ). The broken lines indicate the borders of respective yeast cells. Sup35-GFP formed multiple foci in *SSA1* and *ssa1-45(ts)* cells. Labeling of the chromosomal copy Hsp104 with the red fluorescent protein eqFP611 caused the formation of fewer but more intense Sup35-GFP foci, which remained SDS-resistant and were converted to soluble and diffuse Sup35-GFP upon GdnHCl treatment (not depicted).

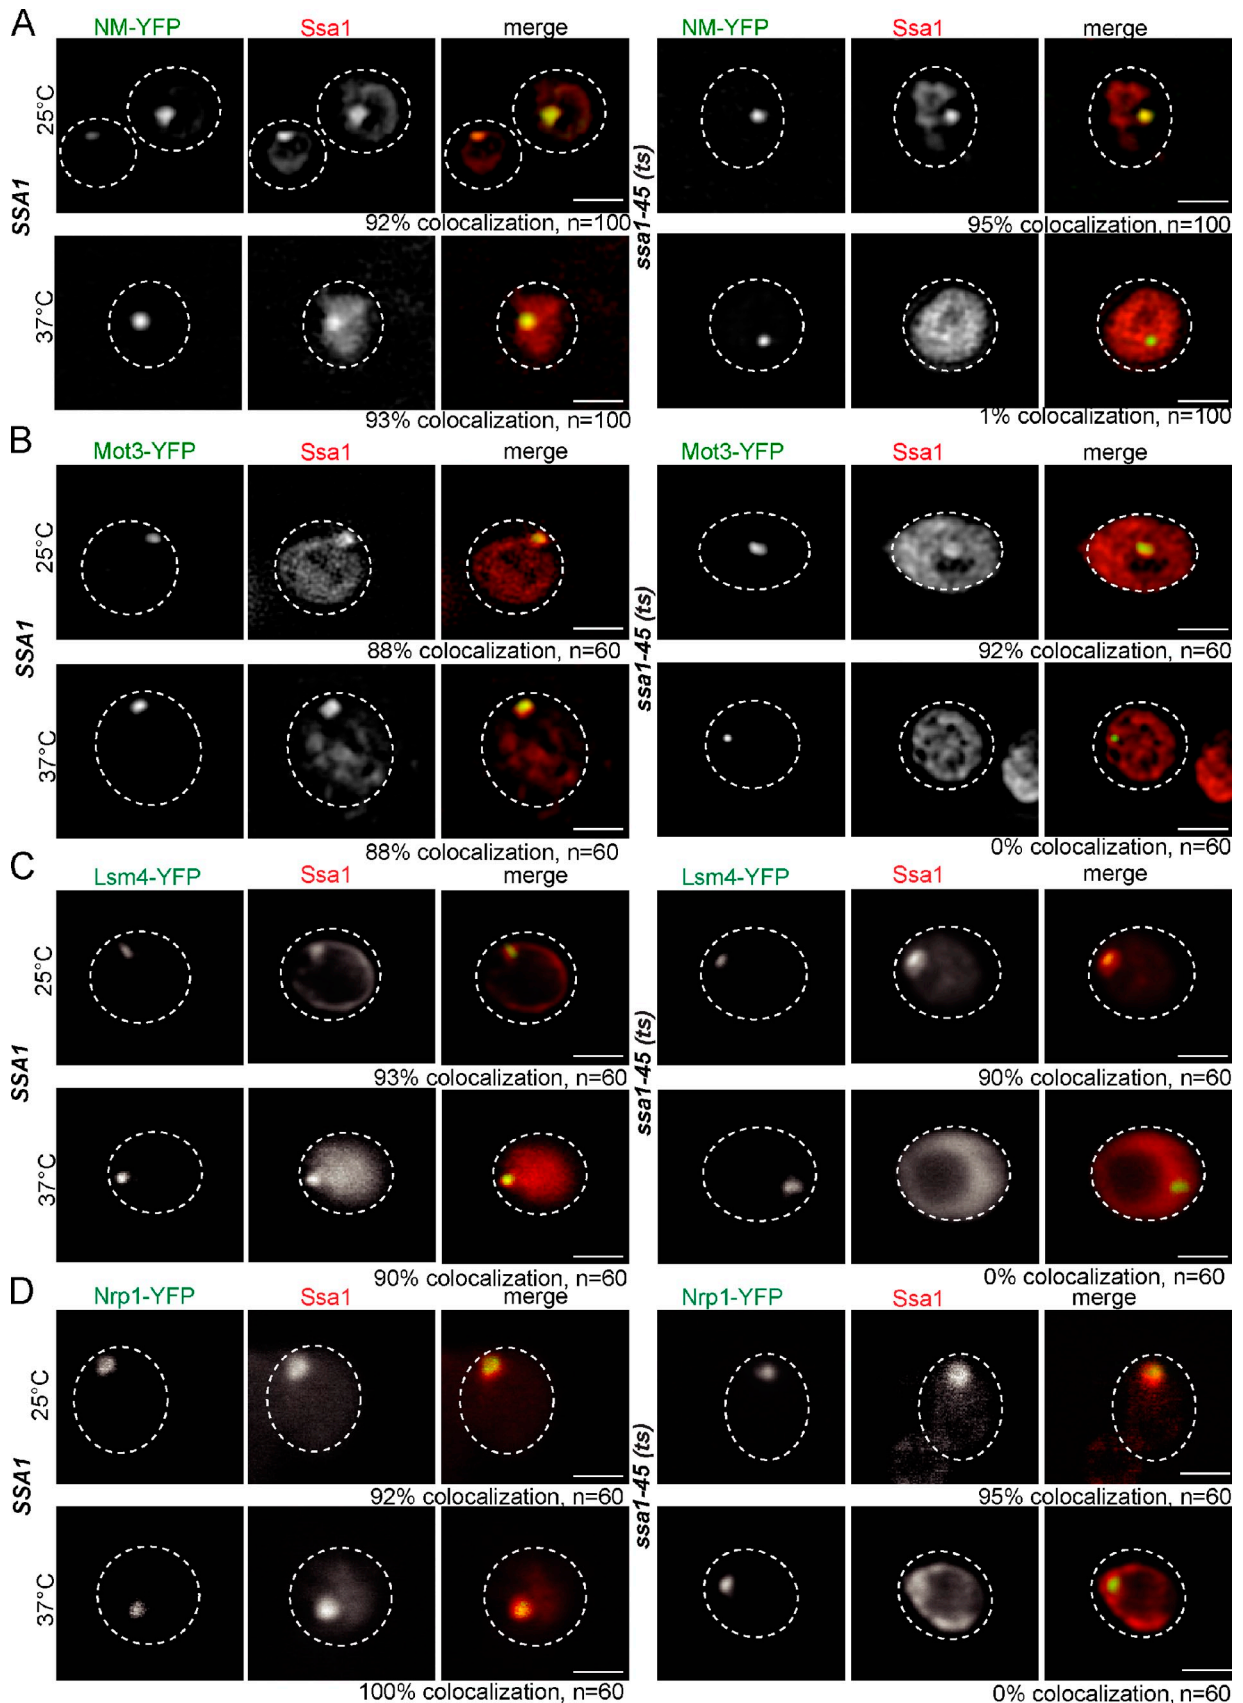

Figure S4. **Ssa1-45 is deficient in binding to prion fibrils at 37°C.** (A) NM-YFP; (B) Mot3-YFP; (C) Lsm4-YFP; (D) Nrp1-YFP. *S. cerevisiae* SSA1 or *ssa1-45(ts)* cells expressing the indicated fluorescent prion domains and Hsp104-CFP were grown at 25°C to mid-log phase and shifted to 37°C for 90 min, resulting in inactivation of Ssa1-45. Cells were fixed, and association of Ssa1-45 with prion aggregates was monitored by immunofluorescence using Ssa-specific antibodies. The broken lines indicate the borders of respective yeast cells. Bars, 2  $\mu$ m.

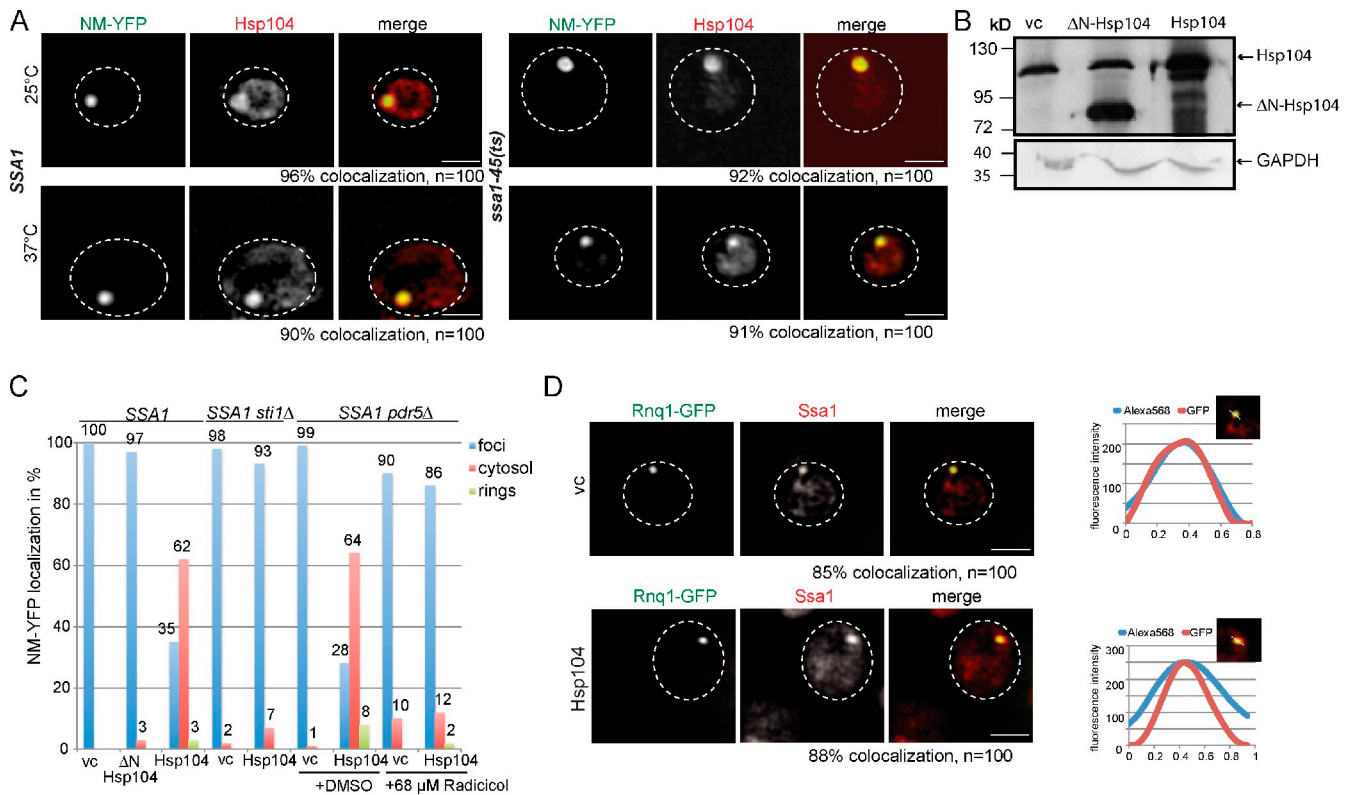

**Figure S5. Overproduction of full-length Hsp104 impairs NM-YFP prion propagation.** (A) Full-length Hsp104 associates with NM-YFP fibrils under permissive conditions. *SSA1* or *ssa1-45(ts)* cells expressing NM-YFP were grown to mid-exponential growth phase at 25°C and shifted to 37°C for 90 min. Cells were fixed and binding of Hsp104 to NM-YFP fibrils was monitored by immunofluorescence using Hsp104-specific antibodies. The broken lines indicate the borders of respective yeast cells. Bars, 2  $\mu$ m. (B) Degree of Hsp104 and/or  $\Delta$ N-Hsp104 overproduction upon induction of the copper-inducible promoter. Plasmid-encoded Hsp104 or  $\Delta$ N-Hsp104 were expressed from a copper-inducible promoter in *S. cerevisiae* *SSA1* cells expressing NM-YFP. First, NM-YFP was induced for 2 h with galactose before copper was added to induce the expression of Hsp104 or  $\Delta$ N-Hsp104 for 8 h. Total cell extracts were prepared and analyzed by Western blotting using Hsp104-specific antibodies. The degree of Hsp104 and  $\Delta$ N-Hsp104 overproduction was verified from three to four independent experiments. Levels of GAPDH were determined by immunoblot analysis using GAPDH-specific antibodies and served as a loading control. (C) Accumulation of soluble NM-YFP and NM-YFP ribbons upon overproduction of full-length Hsp104. Plasmid-encoded Hsp104 or  $\Delta$ N-Hsp104 were expressed from a copper-inducible promoter in *S. cerevisiae* *SSA1* cells, *SSA1 pdr5 $\Delta$* , and *SSA1 sti1 $\Delta$*  expressing NM-YFP. First, NM-YFP was induced for 2 h with galactose before copper was added to induce the expression of the Hsp104 variants for 22 h. Formation of diffuse, dot- and ring-like NM-YFP fluorescence was quantified from 200 cells for *SSA1* cells and from 100 cells for *SSA1 pdr5 $\Delta$*  and *SSA1 sti1 $\Delta$*  cells expressing NM-YFP. (D) Binding of Ssa1 to RNQ-GFP is not perturbed in the presence of high Hsp104 levels. Hsp104-overexpressing *SSA1* cells were fixed, and Ssa1 colocalization with Rnq1-GFP was visualized by immunofluorescence using *SSA1*-specific antibodies. The frequency of colocalization (%) is given ( $n = 100$ ). vc, empty vector control. The broken lines indicate the borders of respective yeast cells. Bars, 2  $\mu$ m.

**Table S1. E. coli plasmids used in this study**

| Plasmid                                   | Resistance      | Origin | Induction levels | Reference          |
|-------------------------------------------|-----------------|--------|------------------|--------------------|
| placIq                                    | Spectinomycin   | p15A   | Constitutive     | Bukau laboratory   |
| pDM1.1                                    | Kanamycin       | p15A   | Constitutive     | Bukau laboratory   |
| pHSG <i>clpB-yfp</i>                      | Chloramphenicol | pSC101 | 200 $\mu$ M IPTG | Bukau laboratory   |
| pHSG <i>dnaK-yfp</i>                      | Chloramphenicol | pSC101 | 100 $\mu$ M IPTG | Bukau laboratory   |
| pDK66 <i>dnaI-yfp</i>                     | Chloramphenicol | pSC101 | 10 $\mu$ M IPTG  | Sourjik laboratory |
| pHSG <i>hsp104-yfp</i>                    | Chloramphenicol | pSC101 | 100 $\mu$ M IPTG | This study         |
| pHSG <i>hbh-yfp</i>                       | Chloramphenicol | pSC101 | 100 $\mu$ M IPTG | This study         |
| pDK66 <i>metA-yfp</i>                     | Ampicillin      | pBR322 | 50 $\mu$ M IPTG  | Bukau laboratory   |
| pHSG- <i>clpB trap-yfp</i>                | Chloramphenicol | pSC101 | 200 $\mu$ M IPTG | This study         |
| pHSG <i>clpB <math>\Delta</math>N-yfp</i> | Chloramphenicol | pSC101 | 200 $\mu$ M IPTG | This study         |
| pUHE21 <i>dnaI</i>                        | Ampicillin      | pBR322 | 100 $\mu$ M IPTG | Bukau laboratory   |
| pUHE21 <i>cbpA</i>                        | Ampicillin      | pBR322 | 100 $\mu$ M IPTG | Bukau laboratory   |
| pUHE21 <i>dnaK</i>                        | Ampicillin      | pBR322 | 100 $\mu$ M IPTG | Bukau laboratory   |
| pUHE 21 <i>dnaKV436F</i>                  | Ampicillin      | pBR322 | 100 $\mu$ M IPTG | Bukau laboratory   |
| pBAD <i>luciferase</i>                    | Ampicillin      | pBR322 | 0.015% arabinose | Bukau laboratory   |

Table S2. *E. coli* strains used in this study

| Strain | Genotype                                                                            | Reference        |
|--------|-------------------------------------------------------------------------------------|------------------|
| MC4100 | F-araD139 Δ(argF-lac)U169* <i>rspL150 relA1 flbB5301 fruA25† deoC1 ptsF25 e14-</i>  | Bukau laboratory |
| BB7140 | MC4100 <i>clpB::kan</i>                                                             | Bukau laboratory |
| BB6735 | MC4100 Δ <i>clpB</i>                                                                | Bukau laboratory |
|        | MC4100 Δ <i>clpB</i> pHSG <i>clpB-yfp</i> <i>placIq</i>                             | This study       |
|        | MC4100 Δ <i>clpB</i> pHSG <i>clpB trap-yfp</i> <i>placIq</i>                        | This study       |
|        | MC4100 Δ <i>clpB</i> pHSG <i>clpB ΔN-yfp</i> <i>placIq</i>                          | This study       |
| BB6735 | MC4100 <i>clpB::kan</i>                                                             |                  |
|        | MC4100 <i>clpB::kan</i> pHSG <i>hsp104-yfp</i> <i>placIq</i>                        | This study       |
|        | MC4100 <i>clpB::kan</i> pHSG <i>clpB-yfp</i> <i>placIq</i>                          | This study       |
|        | MC4100 <i>clpB::kan</i> pHSG <i>hsh-yfp</i> <i>placIq</i>                           | This study       |
|        | MC4100 <i>clpB::kan</i> pHSG <i>dnaK-yfp</i> <i>placIq</i>                          | This study       |
|        | MC4100 <i>clpB::kan</i> pHSG <i>clpB-yfp</i> <i>placIq</i> pBAD <i>luciferase</i>   | This study       |
|        | MC4100 <i>clpB::kan</i> pHSG <i>hsh-yfp</i> <i>placIq</i> pBAD <i>luciferase</i>    | This study       |
|        | MC4100 <i>clpB::kan</i> pHSG <i>placIq</i> pBAD <i>luciferase</i>                   | This study       |
|        | MC4100 <i>clpB::kan</i> pHSG <i>hsp104-yfp</i> <i>placIq</i> pBAD <i>luciferase</i> | This study       |
| BB1064 | MC4100 <i>dnaI::tet</i>                                                             | Bukau laboratory |
|        | MC4100 <i>dnaI::tet</i> pHSG <i>dnaK-yfp</i> pUHE21                                 | This study       |
|        | MC4100 <i>dnaI::tet</i> pHSG <i>dnaK-yfp</i> pUHE21 <i>dnaI</i>                     | This study       |
|        | MC4100 <i>dnaI::tet</i> pHSG <i>dnaK-yfp</i> pUHE21 <i>cbpA</i>                     | This study       |
|        | MC4100 <i>cbpA::kan</i>                                                             | Bukau laboratory |
|        | MC4100 <i>cbpA::kan</i> pHSG <i>dnaK-yfp</i> pUHE21                                 | This study       |
| C600   | F- tonA21 thi-1 thr-1 leuB6 lacY1 glnV44 rfbC1 fhuA1 λ-                             | Bukau laboratory |
|        | C600 pHSG <i>clpB-yfp</i> <i>placIq</i>                                             | This study       |
| BB2393 | C600 <i>dnaK103</i>                                                                 | Bukau laboratory |
|        | C600 <i>dnaK103</i> pDK66 <i>metA-yfp</i>                                           | This study       |
|        | C600 <i>dnaK103</i> pHSG <i>clpB-yfp</i> <i>placIq</i> pUHE21                       | This study       |
|        | C600 <i>dnaK103</i> pHSG <i>clpB-yfp</i> <i>placIq</i> pUHE21 <i>dnaK</i>           | This study       |
|        | C600 <i>dnaK103</i> pHSG <i>clpB-yfp</i> <i>placIq</i> pUHE21 <i>dnaKV436F</i>      | This study       |

Table S3. Yeast plasmids used in this study

| Plasmid                          | Marker | Description                                               | Reference                  |
|----------------------------------|--------|-----------------------------------------------------------|----------------------------|
| pBS10                            | HygB   | pFA6a-link-Cerulean-hphMx4                                | NCRN Yeast Resource Center |
| pYM51                            | HygB   | eqFP611-hphMx4                                            | EUROSCARF                  |
| p423 cup                         | His    | Copper promoter, 2μ                                       | This study                 |
| p423 cup Δ <i>N-hsp104</i>       | His    | Copper promoter, 2μ                                       | This study                 |
| p423 cup <i>hsp104</i>           | His    | Copper promoter, 2μ                                       | This study                 |
| p426 <i>nm-yfp</i>               | Ura    | Gal1 promoter, 2μ                                         | S. Lindquist laboratory    |
| p416 <i>nm-yfp</i>               | Ura    | Gal1 promoter, CEN                                        | This study                 |
| p426 <i>mot3-yfp</i>             | Ura    | Gal1 promoter, 2μ                                         | This study                 |
| p426 <i>lsm4-yfp</i>             | Ura    | Gal1 promoter, 2μ                                         | This study                 |
| p426 <i>nrp1-yfp</i>             | Ura    | Gal1 promoter, 2μ                                         | This study                 |
| p426 <i>rnq1-mcherry</i>         | Ura    | Gal1 promoter, 2μ                                         | This study                 |
| p426 Gal <i>rnq1-gfp</i>         | Ura    | Gal1 promoter, 2μ                                         | This study                 |
| pRS306 <i>citrine luciferase</i> | Ura    | ACT1 promoter, integrative plasmid                        | Bukau laboratory           |
| pSB20                            | Ura    | Integrative plasmid encoding P <sub>sup35</sub> Sup35-GFP | T. Serio laboratory        |
